# Supplementary material for: Elevated adipose tissue associated IL-2 expression in obesity correlates with metabolic inflammation and insulin resistance
Source: PubMed Central journal article supplement (PMC7530670; doi:10.1038/s41598-020-73347-y), 2020-10-01
Supplement: 41598_2020_73347_MOESM1_ESM.pdf [file 41598_2020_73347_MOESM1_ESM.pdf]

**Title:** **Elevated adipose tissue associated IL-2 expression in obesity correlates with metabolic inflammation and insulin resistance**

**Authors:** Shihab Kochumon<sup>1#</sup>, Ashraf Al Madhoun<sup>2,3#</sup>, Fatema Al-Rashed<sup>1,4</sup>,  
Reeby Thomas<sup>1</sup>, Sardar Sindhu<sup>2</sup>, Ebaa Al-Ozairi<sup>5</sup>, Fahd Al-Mulla<sup>3</sup>,  
Rasheed Ahmad<sup>1\*</sup>

**Affiliation:** <sup>1</sup>Immunology & Microbiology Department, Dasman Diabetes Institute, Kuwait <sup>2</sup>Animal and Imaging Core Facilities, Dasman Diabetes Institute, Kuwait

<sup>3</sup>Genetics and Bioinformatics, Dasman Diabetes Institute, Kuwait, Kuwait

<sup>4</sup>Immunology Department, Ministry of Health, Kuwait

<sup>5</sup>Medical Division, Dasman Diabetes Institute, Kuwait

**\*Correspondence:** Rasheed Ahmad, PhD. Immunology & Microbiology Department, Dasman Diabetes Institute, Al-Soor Street, Kuwait, P.O. Box 1180 Dasman, 15462 Kuwait. Phone: 965 2224 2999 Ext. 4311; Fax: 965 2249 2406; E-mail: [rasheed.ahmad@dasmaninstitute.org](mailto:rasheed.ahmad@dasmaninstitute.org)

**A****LEAN****OVERWEIGHT****OBESE**

IL8

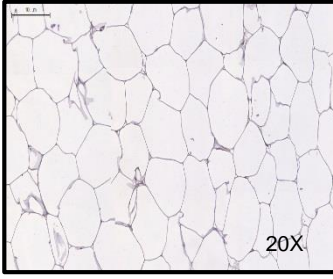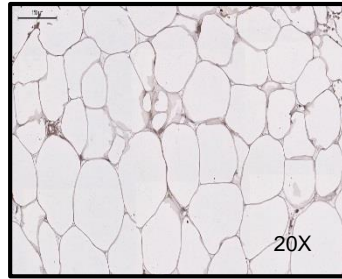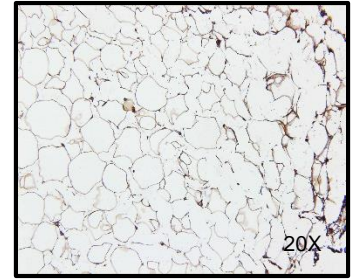

CCL5

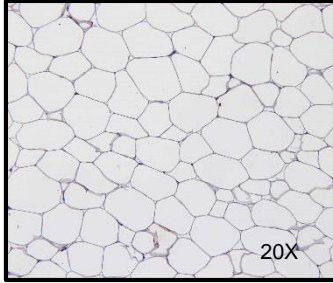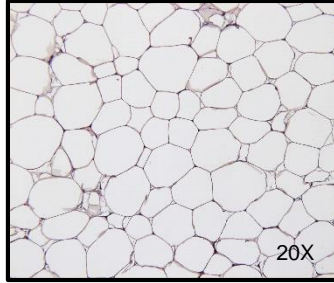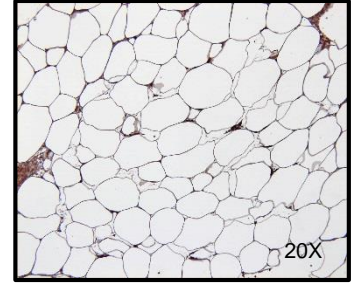

CD11c

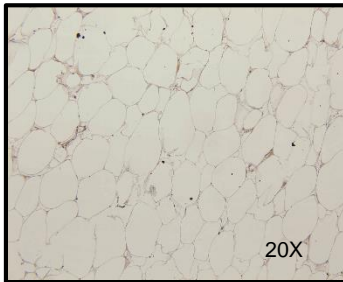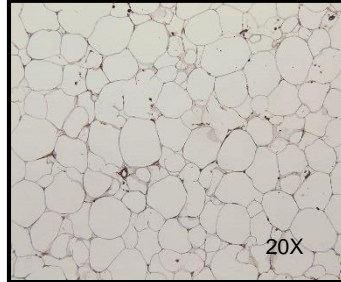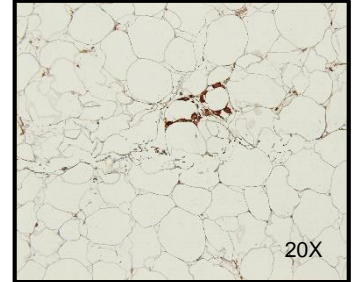

TLR10

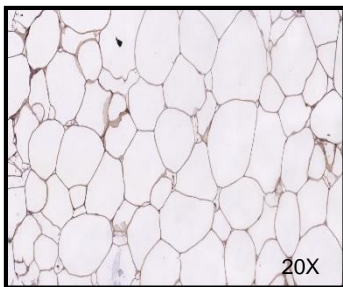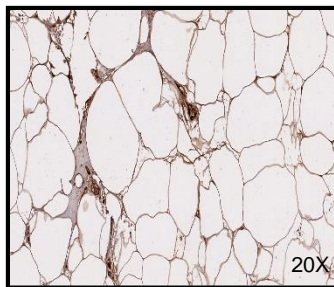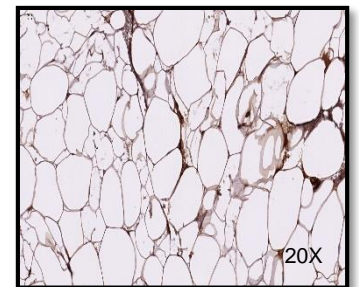

IRF5

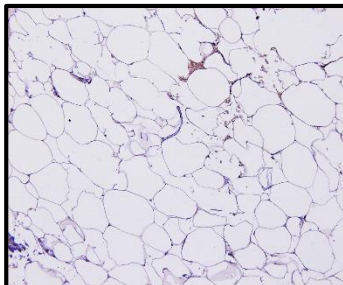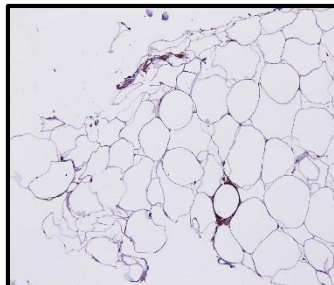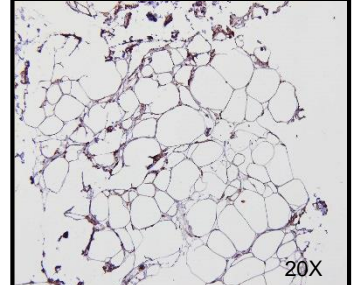

**B**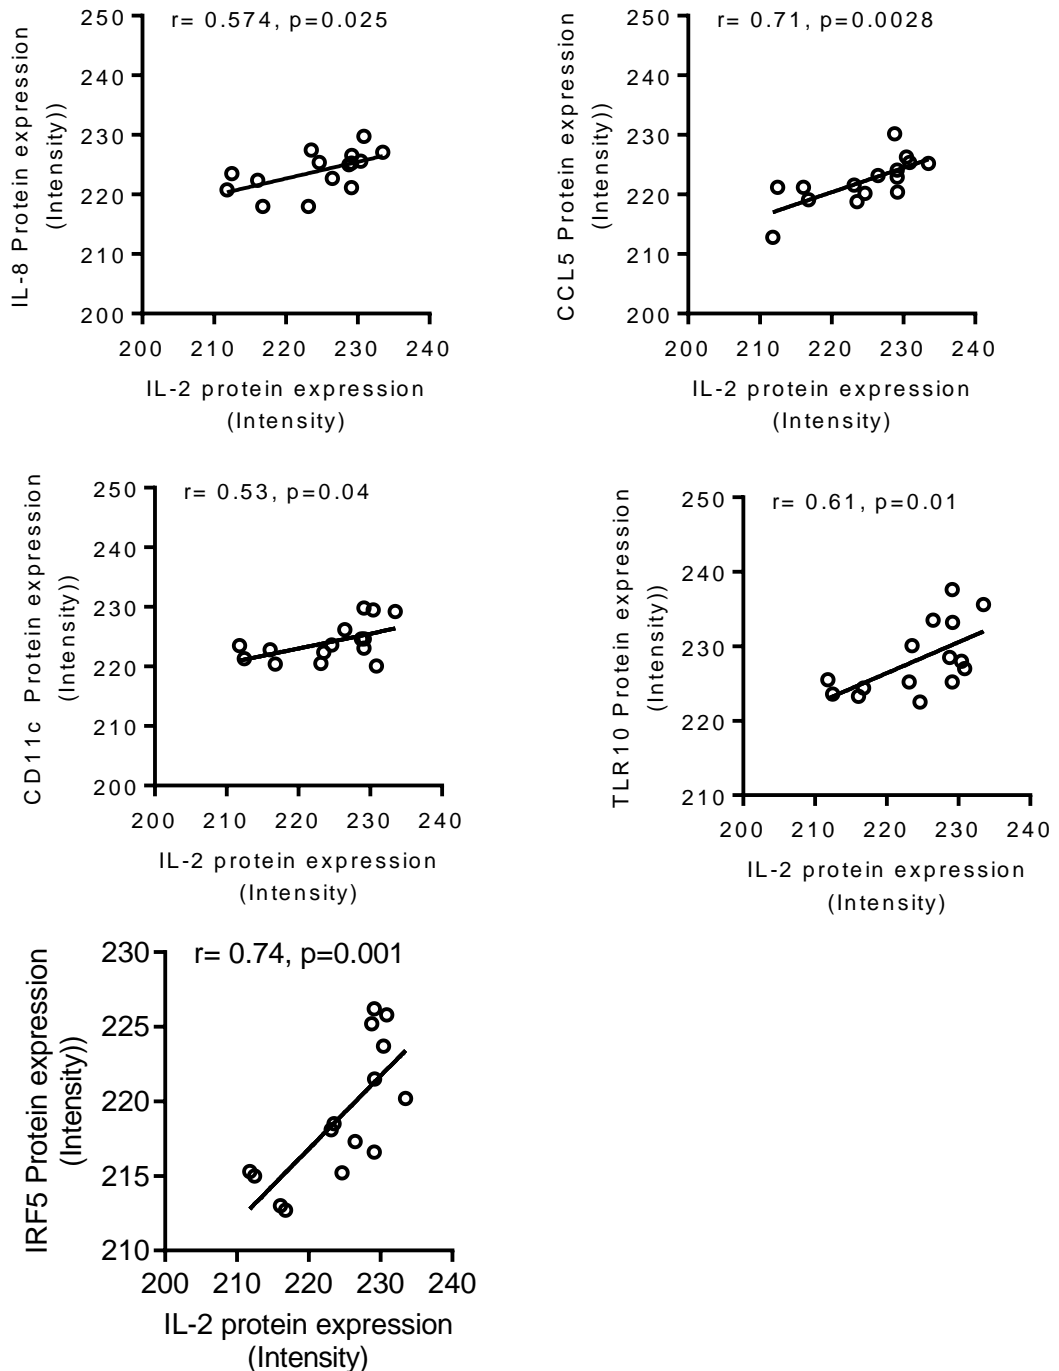

**Figure S1. Increased protein expression of IL-8, CCL5, CD11c, TLR10 and IRF5 in adipose tissues and its correlation with IL-2.** Protein expression of IL-8, CCL5, CD11c, TLR10 and IRF5 expression was determined in five lean, 5 overweight, and 5 obese non-diabetic individuals using immunohistochemistry (IHC) as described in Materials and Methods. (A) The representative IHC images obtained from three independent determinations with similar results show increased adipose tissue IL-8, CCL5, CD11c, TLR10 and IRF5 expression (20X magnification) in overweight and obese individuals compared with lean. (B) Staining intensity was determined based on Aperio-positive pixel counts (Aperio software algorithm version 9.0). IL-2 protein was expressed as IHC intensity in arbitrary units correlated with protein expression of IL-8, CCL5, CD11c, TLR10 and IRF5. All p-values  $\leq 0.05$  were considered as statistically significant.

**Table S1: Partial Correlation of IL-2 with other markers adjusted for High/Low IL-2 cluster variances**

| control Variable       | Variable | r-value | p-value |
|------------------------|----------|---------|---------|
| High/Low IL-2 Clusters |          |         |         |
|                        | IL8      | 0.406   | 0.004   |
|                        | IL12A    | 0.168   | 0.287   |
|                        | CCL5     | 0.572   | <0.0001 |
|                        | CCL19    | 0.582   | <0.0001 |
|                        | CCR2     | 0.599   | <0.0001 |
|                        | CCR5     | 0.561   | <0.0001 |
|                        | ITGAX    | 0.279   | 0.043   |
|                        | CD163    | 0.116   | 0.395   |
|                        | TLR2     | 0.323   | 0.027   |
|                        | TLR8     | 0.269   | 0.049   |
|                        | TLR10    | 0.366   | 0.007   |
|                        | IRF5     | 0.263   | 0.063   |

To validate the possibility of significant associations seen between IL-2 and cytokines/chemokines in Lean/OW/obese subjects could be because of the variances in High/Low IL-2 clusters, Partial Correlation was performed with IL-2 and other markers while controlling for the effect of High/Low IL-2 variances. After adjustment for IL-2 clusters variances all the cytokine/chemokine markers remain significantly correlated except with IL-12A and CD163.

**Table S2: List of TaqMan Assays used for qRT-PCR**

| Primer List  | Assay ID      | Primer List  | Assay ID      |
|--------------|---------------|--------------|---------------|
| IL-1 $\beta$ | Hs01555410_m1 | ITGAX/CD11c  | Hs00174217_m1 |
| IL-5         | Hs01548712_g1 | CD163        | Hs00174705_m1 |
| IL-6         | Hs00985639_m1 | CXCL9        | Hs00171065_m1 |
| IL-8         | Hs00174103_m1 | CXCL10       | Hs01124251_g1 |
| IL-10        | Hs00961622_m1 | CXCL11       | Hs04187682_g1 |
| IL-12A       | Hs01073447_m1 | TNF $\alpha$ | Hs01113624_g1 |
| IL-13        | Hs00174379_m1 | TGF $\beta$  | Hs00820148_g1 |
| IL-18        | Hs01038788_m1 | IFNB1        | Hs01077958_s1 |
| CCL2         | Hs00234140_m1 | TLR2         | Hs01872448_s1 |
| CCL3         | Hs04194942_s1 | TLR3         | Hs01551078_m1 |
| CCL5         | Hs00982282_m1 | TLR4         | Hs00152939_m1 |
| CCL8         | Hs04187715_m1 | TLR7         | Hs01933259_s1 |
| CCL11        | Hs00237013_m1 | TLR8         | Hs00152972_m1 |
| CCL15        | Hs00361122_m1 | TLR9         | Hs00370913_s1 |
| CCL19        | Hs00171149_m1 | TLR10        | Hs01935337_s1 |
| CCL20        | Hs01011368_m1 | MyD88        | Hs01573837_g1 |
| CCR1         | Hs00928897_s1 | IRAK1        | Hs01018347_m1 |
| CCR2         | Hs00704702_s1 | TRAF6        | Hs00371512_g1 |
| CCR5         | Hs99999149_s1 | IRF5         | Hs00158114_m1 |
| CD16         | Hs04334165_m1 | GAPDH        | Hs03929097_g1 |
